# Supplementary material for: Reduction of CO2 and SO2 with low valent nickel compounds under mild conditions
Source: Royal Society of Chemistry journal article supplement (doi:10.1039/c1dt10972c), 2011-01-01
Supplement: c1dt10972c.pdf [file c1dt10972c.pdf]

## Supplementary Information

### Reduction of CO<sub>2</sub> and SO<sub>2</sub> with low valent Nickel compounds under mild conditions

Lucero González-Sebastián, Marcos Flores-Alamo and Juventino J. García\*

*Facultad de Química. Universidad Nacional Autónoma de México. México City. 04510. México*

#### INDEX

- 1.- <sup>31</sup>P{<sup>1</sup>H} NMR of complex (1)
- 2.- <sup>31</sup>P{<sup>1</sup>H}, <sup>13</sup>C{<sup>1</sup>H} and MS-EI<sup>+</sup> spectra of complex (2)
- 3.- <sup>31</sup>P{<sup>1</sup>H} and <sup>13</sup>C{<sup>1</sup>H} spectra of the thermolysis of complex (2)
- 4.- <sup>31</sup>P{<sup>1</sup>H} spectra of the reaction of complex (2) with CO gas
- 5.- Crystallographic data of complexes (1) and (5)

1.-  $^{31}\text{P}\{^1\text{H}\}$  NMR of complex (1)

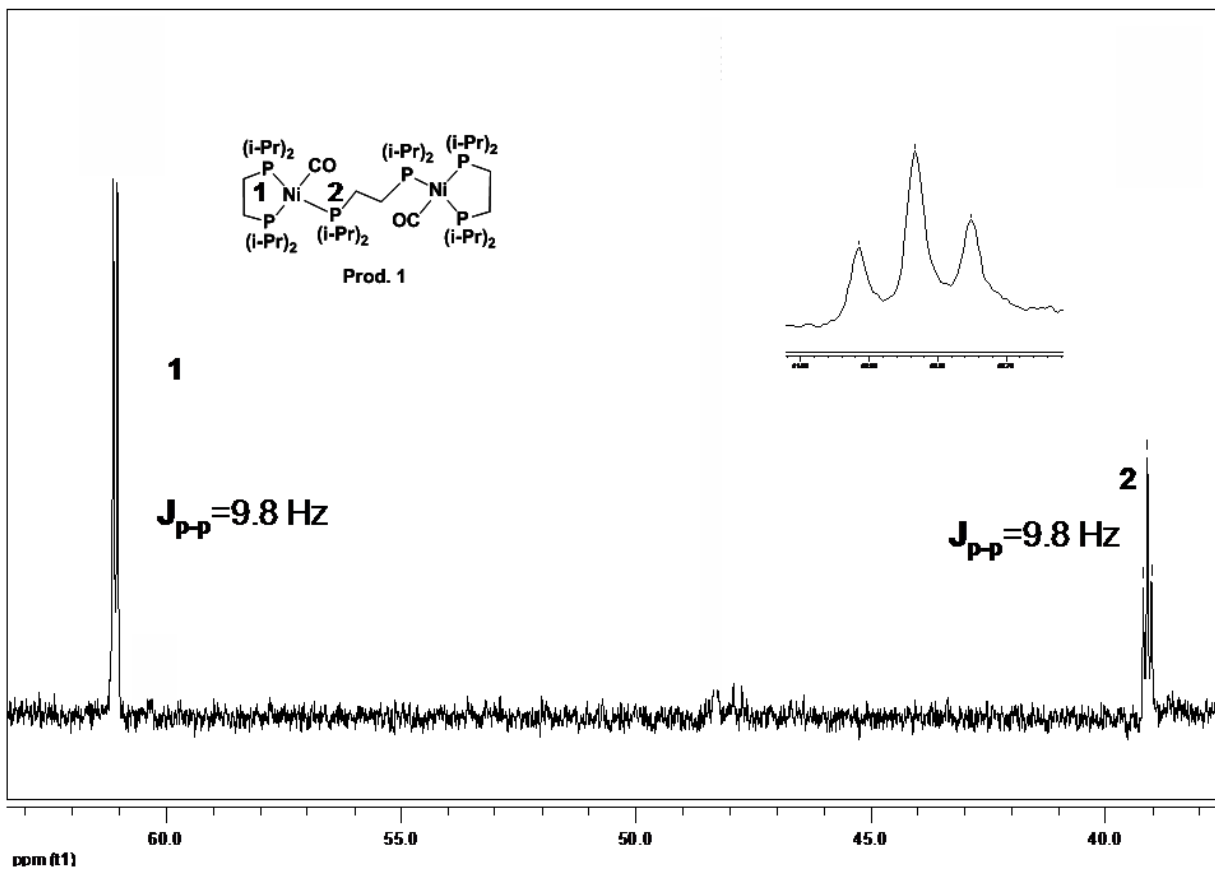

Figure S1.  $^{31}\text{P}\{^1\text{H}\}$ -NMR spectra of complex (1) in Toluene- $d_8$

2.-  $^{31}\text{P}\{^1\text{H}\}$ ,  $^{13}\text{C}\{^1\text{H}\}$  and MS-EI $^+$  spectra of complex (2)

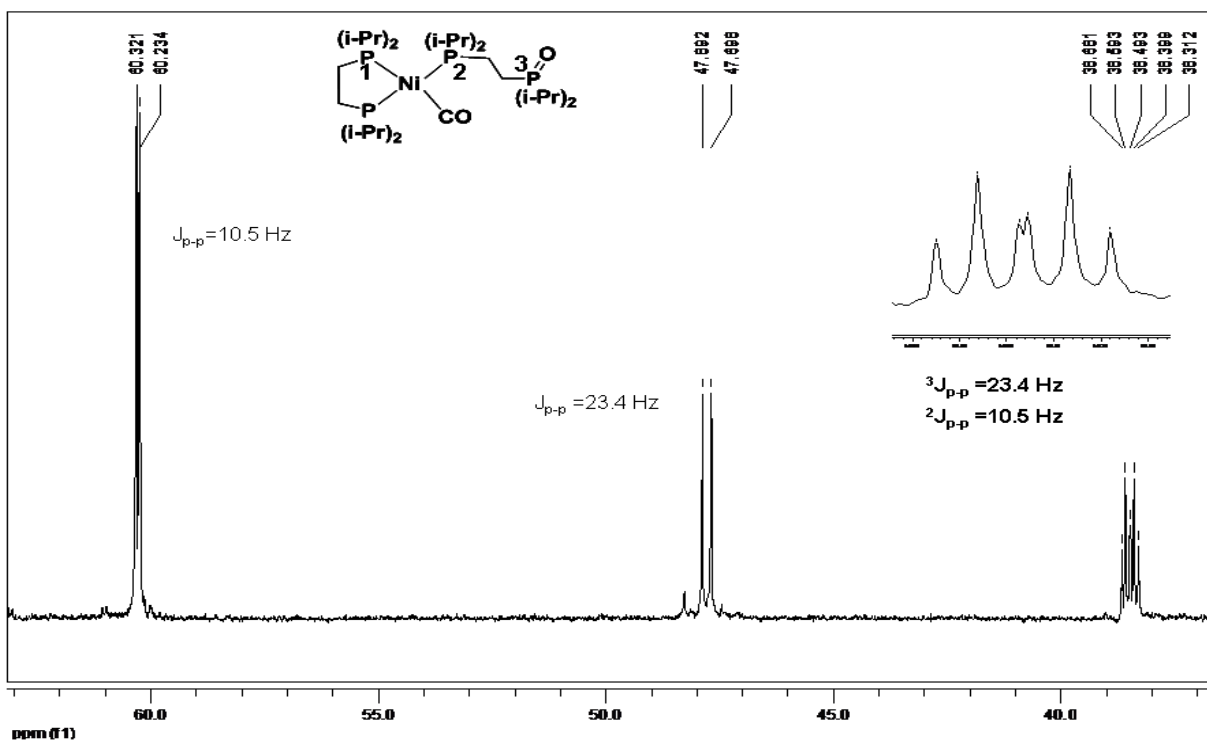

Figure S2.  $^{31}\text{P}\{^1\text{H}\}$ -NMR spectra of complex (2) in Toluene- $d_8$

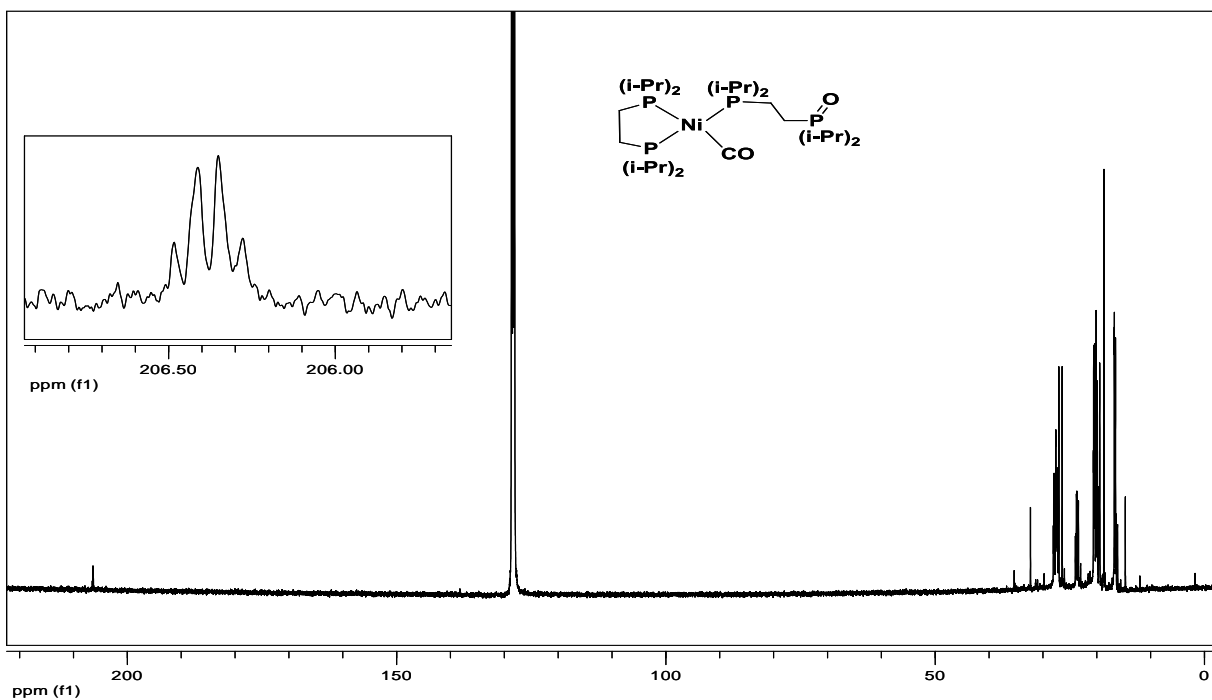

Figure S3.  $^{13}\text{C}\{^1\text{H}\}$ -NMR spectra of complex (2) in Benzene- $d_6$

D:\Xcalibur\data\USA\IND\OT5021\_2

11/11/2010 6:42:37 PM

LU26F1 PURIFICADO

szComment

OT5021\_2 #9-11 RT: 1.77-2.21 AV: 3 NL: 1

T: + c EI Full ms [ 49.50-1000.50]

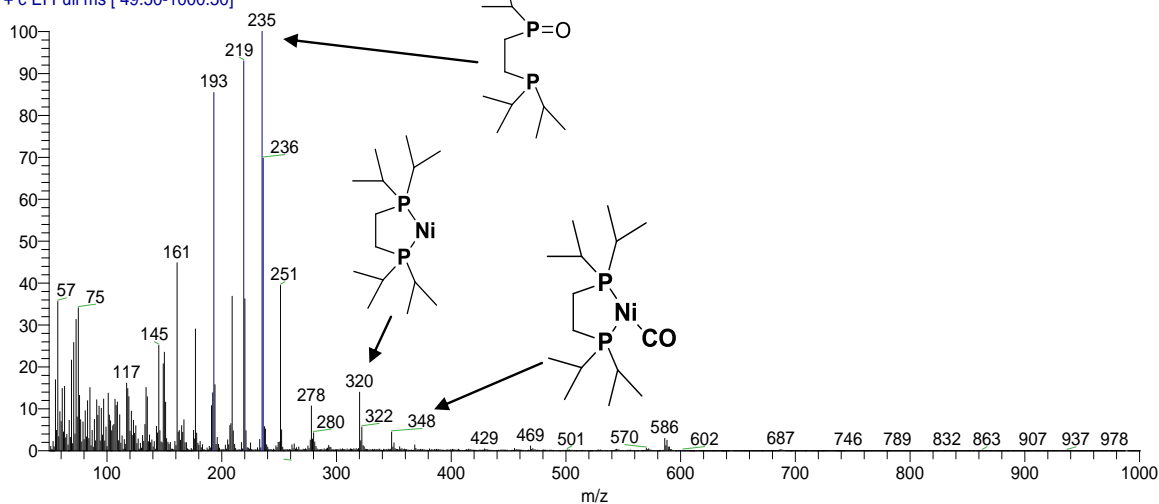

OT5021\_2 #9-11 RT: 1.77-2.21 AV: 3 NL: 1.55E8

T: + c EI Full ms [ 49.50-1000.50]

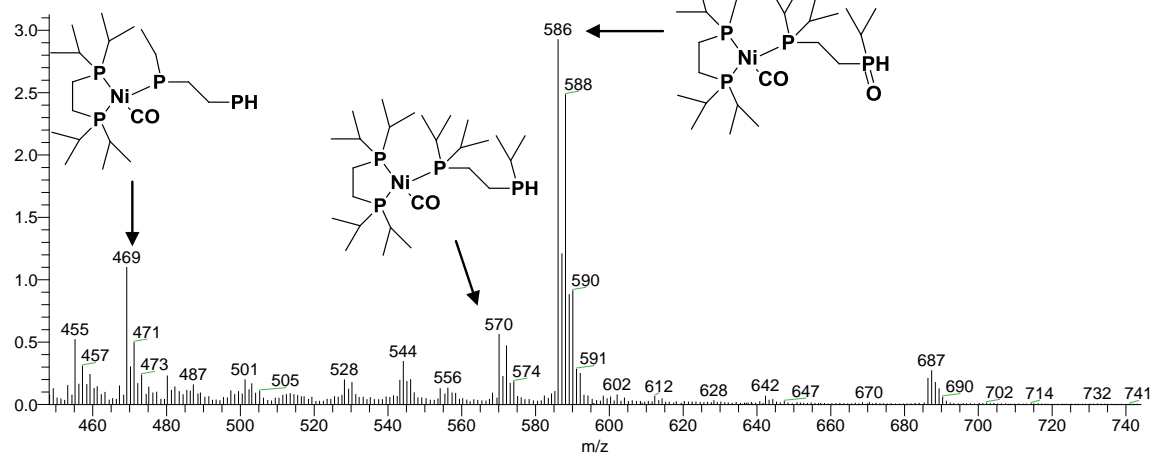

Figure S4. MS-EI<sup>+</sup> spectra of complex (2)

### 3.- $^{31}\text{P}\{^1\text{H}\}$ and $^{13}\text{C}\{^1\text{H}\}$ spectra of the thermolysis of complex (2)

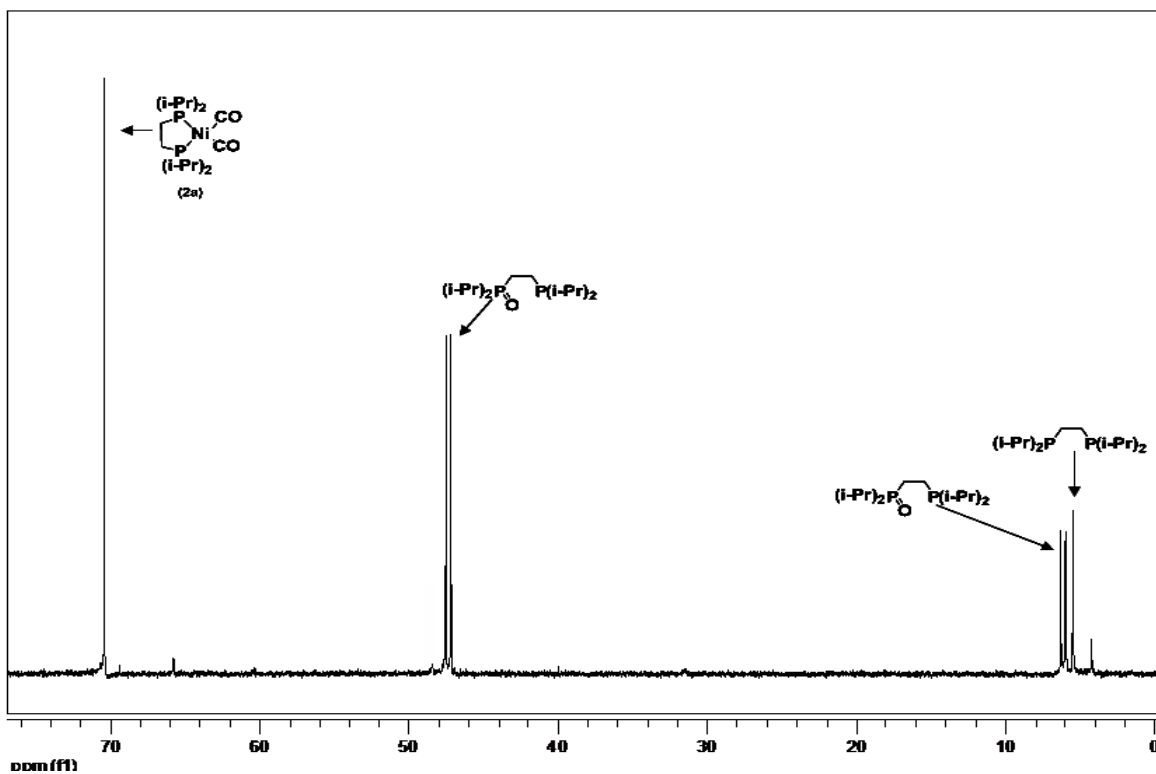

**Figure S5.**  $^{31}\text{P}\{^1\text{H}\}$ -NMR spectra of thermolysis of complex (2) recorded after 5h at 100°C in Toluene-d<sub>8</sub>

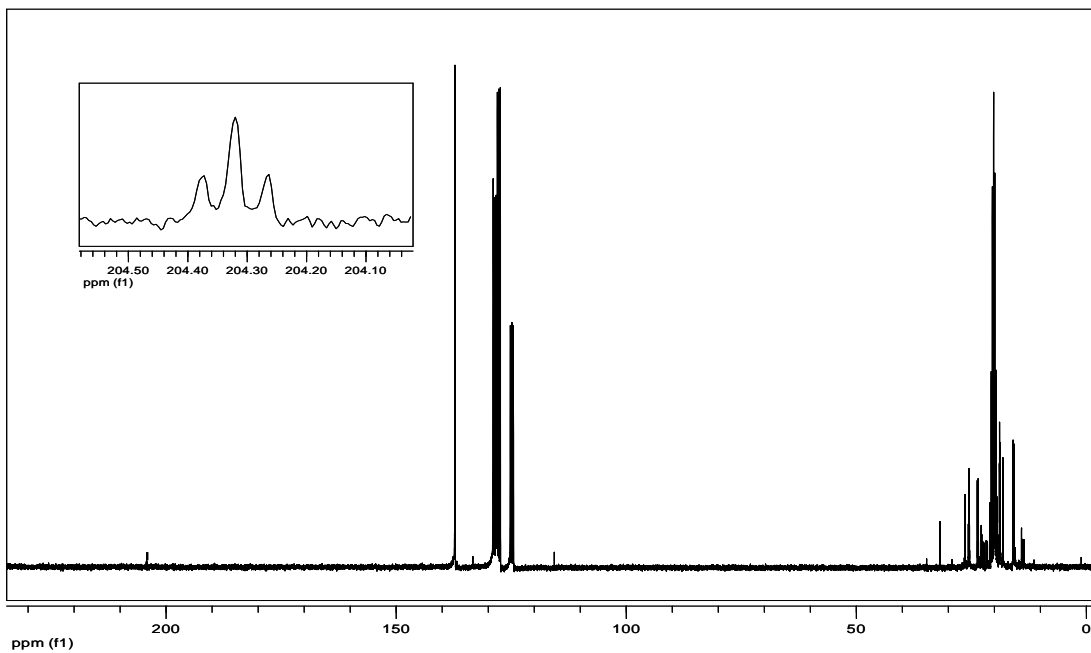

**Figure S6.**  $^{13}\text{C}\{^1\text{H}\}$ -NMR spectra of thermolysis of complex (2) recorded after 5h at 100°C in Toluene-d<sub>8</sub>

4.-  $^{31}\text{P}\{^1\text{H}\}$  spectrum of the reaction of complex (2) with  $\text{CO}_2$

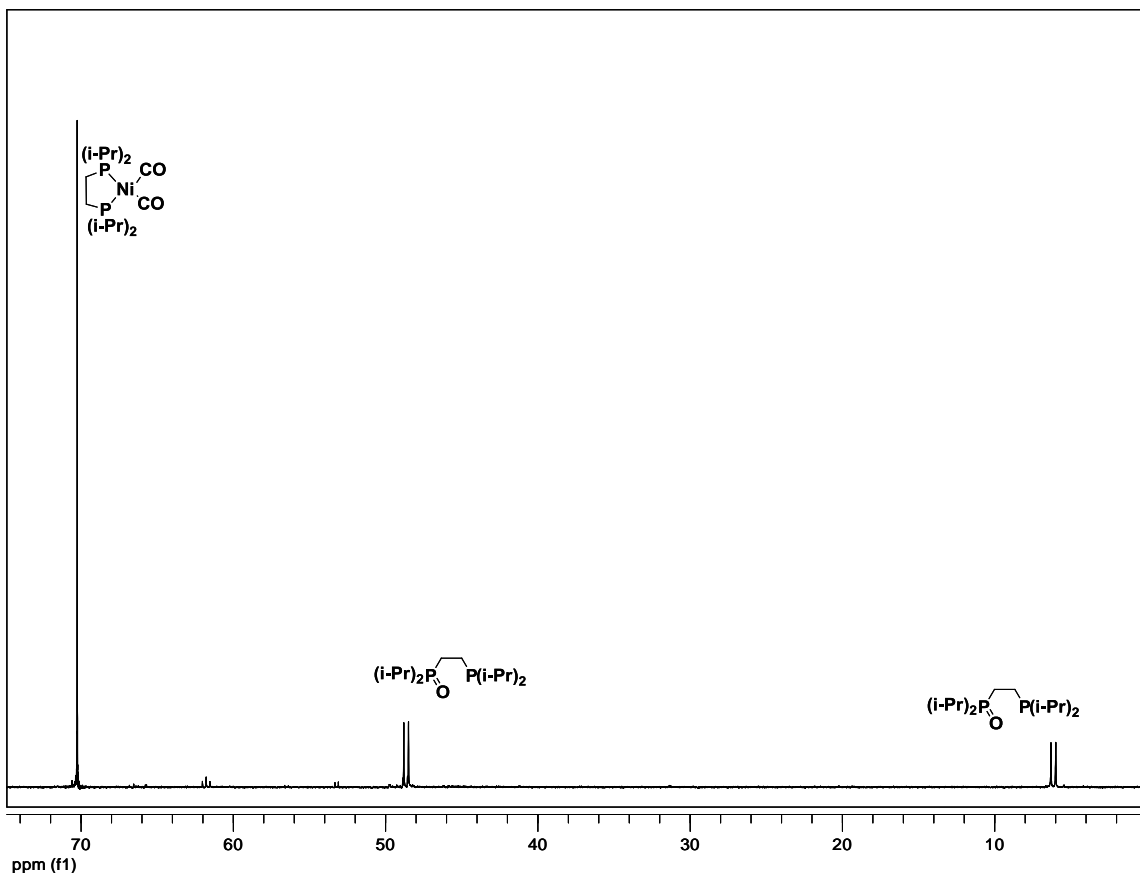

Figure S7.  $^{31}\text{P}\{^1\text{H}\}$  spectrum of the reaction of complex (2) with  $\text{CO}_2$

## 5.-Crystallographic data of complexes (1) and (5)

**Table SI.** Summary of crystallographic data for complex (1)

|                                   |                                                                               |                  |
|-----------------------------------|-------------------------------------------------------------------------------|------------------|
| Empirical formula                 | C <sub>44</sub> H <sub>96</sub> Ni <sub>2</sub> O <sub>2</sub> P <sub>6</sub> |                  |
| Formula weight                    | 960.45                                                                        |                  |
| Temperature                       | 130(2) K                                                                      |                  |
| Wavelength                        | 1.54180 Å                                                                     |                  |
| Crystal system                    | Triclinic                                                                     |                  |
| Space group                       | P-1                                                                           |                  |
| Unit cell dimensions              | a = 8.7220(6) Å                                                               | α = 102.320(6)°. |
|                                   | b = 11.5158(8) Å                                                              | β = 91.092(6)°.  |
|                                   | c = 14.3744(10) Å                                                             | γ = 112.112(7)°. |
| Volume                            | 1298.88(16) Å <sup>3</sup>                                                    |                  |
| Z                                 | 1                                                                             |                  |
| Density (calculated)              | 1.228 Mg/m <sup>3</sup>                                                       |                  |
| Absorption coefficient            | 2.881 mm <sup>-1</sup>                                                        |                  |
| F(000)                            | 522                                                                           |                  |
| Crystal size                      | 0.28 x 0.18 x 0.049 mm <sup>3</sup>                                           |                  |
| Theta range for data collection   | 4.27 to 68.11°.                                                               |                  |
| Index ranges                      | -10 ≤ h ≤ 7, -12 ≤ k ≤ 13, -17 ≤ l ≤ 17                                       |                  |
| Reflections collected             | 8546                                                                          |                  |
| Independent reflections           | 4721 [R(int) = 0.0298]                                                        |                  |
| Completeness to theta = 68.11°    | 99.3 %                                                                        |                  |
| Refinement method                 | Full-matrix least-squares on F <sup>2</sup>                                   |                  |
| Data / restraints / parameters    | 4721 / 0 / 256                                                                |                  |
| Goodness-of-fit on F <sup>2</sup> | 1.083                                                                         |                  |
| Final R indices [I > 2σ(I)]       | R1 = 0.0394, wR2 = 0.0905                                                     |                  |
| R indices (all data)              | R1 = 0.0499, wR2 = 0.0957                                                     |                  |
| Largest diff. peak and hole       | 0.472 and -0.357 e.Å <sup>-3</sup>                                            |                  |

**Table S2.** Atomic coordinates ( $\times 10^4$ ) and equivalent isotropic displacement parameters ( $\text{\AA}^2 \times 10^3$ ) for (1).  $U(\text{eq})$  is defined as one third of the trace of the orthogonalized  $U^{ij}$  tensor.

|       | x       | y        | z       | U(eq) |
|-------|---------|----------|---------|-------|
| Ni(1) | 3656(1) | 2554(1)  | 2918(1) | 12(1) |
| P(1)  | 5299(1) | 3219(1)  | 1829(1) | 14(1) |
| P(2)  | 2720(1) | 554(1)   | 2073(1) | 14(1) |
| P(3)  | 4635(1) | 2886(1)  | 4432(1) | 11(1) |
| O(1)  | 1190(3) | 3706(2)  | 2992(2) | 30(1) |
| C(1)  | -414(4) | 431(3)   | 1405(2) | 30(1) |
| C(2)  | 434(4)  | -378(3)  | 1747(2) | 23(1) |
| C(3)  | -394(4) | -865(3)  | 2588(2) | 31(1) |
| C(4)  | 2548(5) | -2069(3) | 1736(2) | 34(1) |
| C(5)  | 3387(4) | -702(3)  | 2369(2) | 20(1) |
| C(6)  | 5276(4) | -260(3)  | 2392(2) | 30(1) |
| C(7)  | 2963(4) | 3410(3)  | 549(2)  | 31(1) |
| C(8)  | 4707(4) | 4167(3)  | 1087(2) | 22(1) |
| C(9)  | 4799(5) | 5457(3)  | 1695(2) | 33(1) |
| C(10) | 8239(4) | 5237(3)  | 2834(2) | 32(1) |
| C(11) | 7625(4) | 4022(3)  | 2019(2) | 22(1) |
| C(12) | 8521(4) | 4296(4)  | 1131(2) | 38(1) |
| C(13) | 5086(4) | 1748(3)  | 905(2)  | 20(1) |
| C(14) | 3421(4) | 623(3)   | 864(2)  | 20(1) |
| C(15) | 6878(4) | 2698(3)  | 5842(2) | 24(1) |
| C(16) | 6372(3) | 2421(3)  | 4768(2) | 17(1) |
| C(17) | 7897(4) | 3020(3)  | 4263(2) | 29(1) |
| C(18) | 1455(3) | 2293(3)  | 5062(2) | 19(1) |
| C(19) | 3060(3) | 2084(3)  | 5206(2) | 15(1) |
| C(20) | 2669(4) | 639(3)   | 5029(2) | 22(1) |
| C(21) | 5412(3) | 4579(2)  | 5152(2) | 14(1) |
| C(22) | 2152(3) | 3236(3)  | 2974(2) | 17(1) |



**Table S3.** Summary of crystallographic data for complex (5)

|                                   |                                                                                 |          |
|-----------------------------------|---------------------------------------------------------------------------------|----------|
| Empirical formula                 | C <sub>14</sub> H <sub>32</sub> Ni O <sub>3</sub> P <sub>2</sub> S <sub>2</sub> |          |
| Formula weight                    | 433.17                                                                          |          |
| Temperature                       | 130 (2) K                                                                       |          |
| Wavelength                        | 0.71073 Å                                                                       |          |
| Crystal system                    | Tetragonal                                                                      |          |
| Space group                       | P4 <sub>2</sub> /n                                                              |          |
| Unit cell dimensions              | a = 22.7088(3) Å                                                                | α = 90°. |
|                                   | b = 22.7088(3) Å                                                                | β = 90°. |
|                                   | c = 7.9025(2) Å                                                                 | γ = 90°. |
| Volume                            | 4075.24(13) Å <sup>3</sup>                                                      |          |
| Z                                 | 8                                                                               |          |
| Density (calculated)              | 1.412 Mg/m <sup>3</sup>                                                         |          |
| Absorption coefficient            | 1.322 mm <sup>-1</sup>                                                          |          |
| F(000)                            | 1840                                                                            |          |
| Crystal size                      | 0.266 x 0.0823 x 0.0443 mm <sup>3</sup>                                         |          |
| Theta range for data collection   | 3.59 to 26.05°.                                                                 |          |
| Index ranges                      | -28 ≤ h ≤ 28, -21 ≤ k ≤ 28, -9 ≤ l ≤ 9                                          |          |
| Reflections collected             | 29432                                                                           |          |
| Independent reflections           | 4020 [R(int) = 0.0494]                                                          |          |
| Completeness to theta = 26.05°    | 99.8 %                                                                          |          |
| Refinement method                 | Full-matrix least-squares on F <sup>2</sup>                                     |          |
| Data / restraints / parameters    | 4020 / 0 / 207                                                                  |          |
| Goodness-of-fit on F <sup>2</sup> | 1.096                                                                           |          |
| Final R indices [I > 2σ(I)]       | R1 = 0.0361, wR2 = 0.0961                                                       |          |
| R indices (all data)              | R1 = 0.0488, wR2 = 0.0989                                                       |          |
| Largest diff. peak and hole       | 0.887 and -0.905 e.Å <sup>-3</sup>                                              |          |

**Table S4.** Atomic coordinates ( $\times 10^4$ ) and equivalent isotropic displacement parameters ( $\text{\AA}^2 \times 10^3$ )

for (5).  $U(\text{eq})$  is defined as one third of the trace of the orthogonalized  $U^{ij}$  tensor.

|       | x       | y       | z        | $U(\text{eq})$ |
|-------|---------|---------|----------|----------------|
| C(1)  | 8927(1) | 4071(1) | 9618(4)  | 32(1)          |
| C(2)  | 9100(2) | 4557(2) | 10852(4) | 41(1)          |
| C(3)  | 9450(2) | 3660(2) | 9242(5)  | 43(1)          |
| C(4)  | 8431(1) | 3749(1) | 6297(4)  | 33(1)          |
| C(5)  | 8049(2) | 3286(2) | 7165(6)  | 55(1)          |
| C(6)  | 8169(2) | 3940(2) | 4630(5)  | 45(1)          |
| C(7)  | 7863(1) | 5952(1) | 4924(4)  | 27(1)          |
| C(8)  | 7644(1) | 5489(2) | 3686(4)  | 37(1)          |
| C(9)  | 8161(2) | 6461(2) | 3989(4)  | 46(1)          |
| C(10) | 8539(1) | 6241(1) | 7947(4)  | 23(1)          |
| C(11) | 7998(1) | 6520(1) | 8785(4)  | 31(1)          |
| C(12) | 8991(1) | 6059(1) | 9264(4)  | 31(1)          |
| C(13) | 8977(1) | 5309(1) | 5596(4)  | 24(1)          |
| C(14) | 9205(1) | 4781(1) | 6608(4)  | 26(1)          |
| Ni(1) | 7862(1) | 4948(1) | 8031(1)  | 18(1)          |
| O(1)  | 7138(1) | 5379(1) | 8171(3)  | 27(1)          |
| O(2)  | 6639(1) | 5348(1) | 10857(3) | 52(1)          |
| O(3)  | 6279(1) | 4757(1) | 8638(3)  | 40(1)          |
| P(1)  | 8314(1) | 5618(1) | 6595(1)  | 19(1)          |
| P(2)  | 8601(1) | 4381(1) | 7673(1)  | 23(1)          |
| S(1)  | 6792(1) | 5005(1) | 9406(1)  | 24(1)          |
| S(2)  | 7413(1) | 4395(1) | 9881(1)  | 44(1)          |
